# Supplementary material
Source: PubMed Central journal article supplement (PMC9589030)
Supplement: mmc1.pdf [file mmc1.pdf]

**Supplemental information**

**A molecularly engineered, broad-spectrum**

**anti-coronavirus lectin inhibits**

**SARS-CoV-2 and MERS-CoV infection *in vivo***

**Jasper Fuk-Woo Chan, Yoo Jin Oh, Shuofeng Yuan, Hin Chu, Man-Lung Yeung, Daniel Canena, Chris Chung-Sing Chan, Vincent Kwok-Man Poon, Chris Chun-Yiu Chan, Anna Jinxia Zhang, Jian-Piao Cai, Zi-Wei Ye, Lei Wen, Terrence Tsz-Tai Yuen, Kenn Ka-Heng Chik, Huiping Shuai, Yixin Wang, Yuxin Hou, Cuiting Luo, Wan-Mui Chan, Zhenzhi Qin, Ko-Yung Sit, Wing-Kuk Au, Maureen Legendre, Rong Zhu, Lisa Hain, Hannah Seferovic, Robert Tampé, Kelvin Kai-Wang To, Kwok-Hung Chan, Dafydd Gareth Thomas, Miriam Klausberger, Cheng Xu, James J. Moon, Johannes Stadlmann, Josef M. Penninger, Chris Oostenbrink, Peter Hinterdorfer, Kwok-Yung Yuen, and David M. Markovitz**

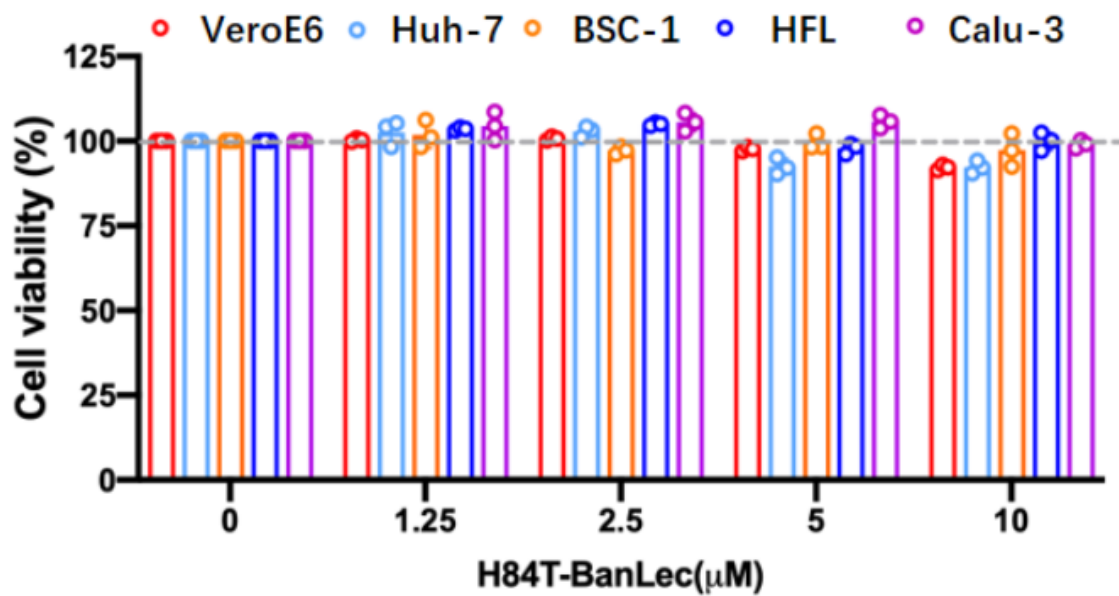

**Figure S1. The cytotoxicity of H84T-BanLec in different cell lines.** The cytotoxicity of H84T-BanLec in VeroE6, Huh7, BSC-1, HFL, and Calu-3 cells was evaluated using the CellTiterGlo® luminescent cell viability assay according to manufacturer’s instructions. H84T-BanLec did not display any obvious cytotoxicity in any of these cell lines even at the concentration of 10μM (ie: 10,000nM). Related to Figure 1.

(A)

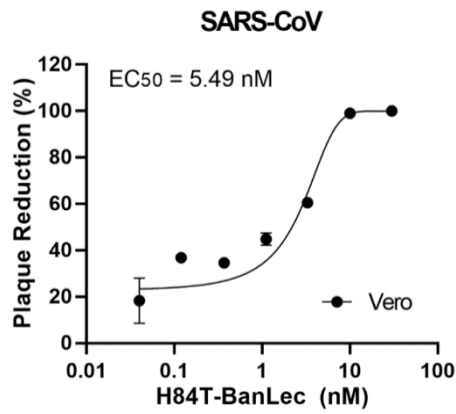

(B)

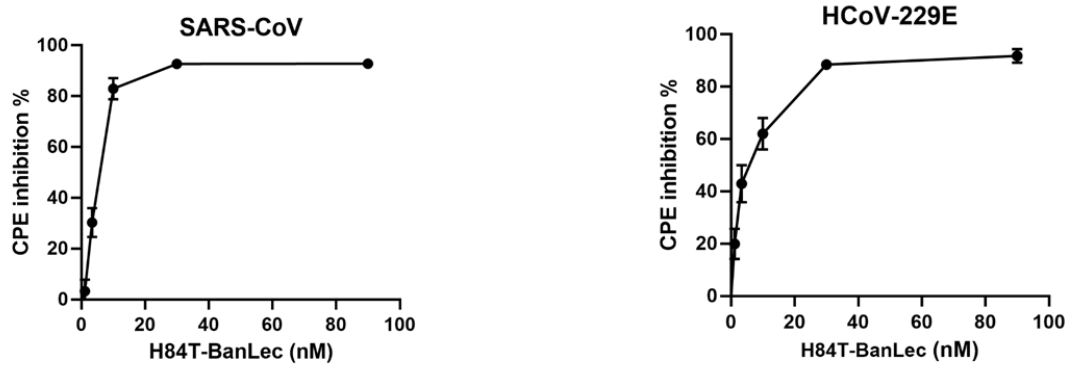

**Figure S2. Antiviral activity of H84T-BanLec against other human-pathogenic coronaviruses.** The antiviral activity of H84T-BanLec against SARS-CoV by **A**, plaque reduction assay and **B, (left)** CPE inhibition assay; and **B, (right)** against HCoV-229E by CPE inhibition assay. Related to Figure 1.

**(A)****SARS-CoV-2 (B.1.1.7 Alpha variant)**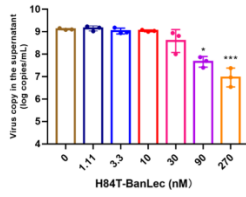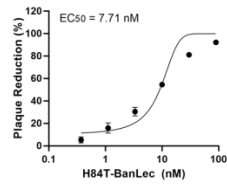**(B)****SARS-CoV-2 (B.1.617.2 Delta variant)**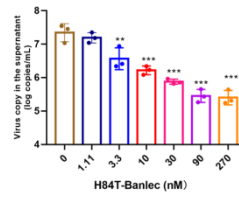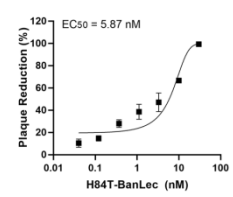**(C)****SARS-CoV-2 (P.3 Theta variant)**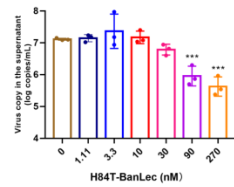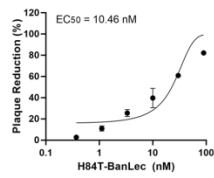**(D)****SARS-CoV-2 (B.1.1.529 Omicron variant)**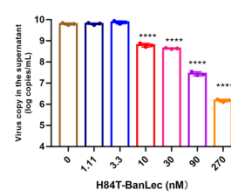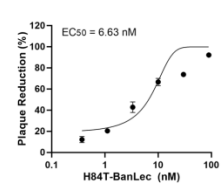

**Figure S3. Antiviral activity of H84T-BanLec against emerging SARS-CoV-2 variants.** The antiviral activity of H84T-BanLec against SARS-CoV-2: **A**, B.1.1.7 (Alpha, with N501Y), **B**, B.1.617.2 (Delta), **C**, P.3 (Theta, with N501Y, E484K, and 141 to 143 deletion), and **D**, B.1.1.529 (Omicron) variants were evaluated by **(left)** viral load reduction and **(right)** plaque reduction assays in VeroE6-TMPRSS2 cells. Data are mean  $\pm$  s.d.,  $n = 3$  biological replicates. One-way ANOVA. \*\*\* $P < 0.001$ , \*\* $P < 0.01$ , \* $P < 0.05$ . Related to Figure 1.

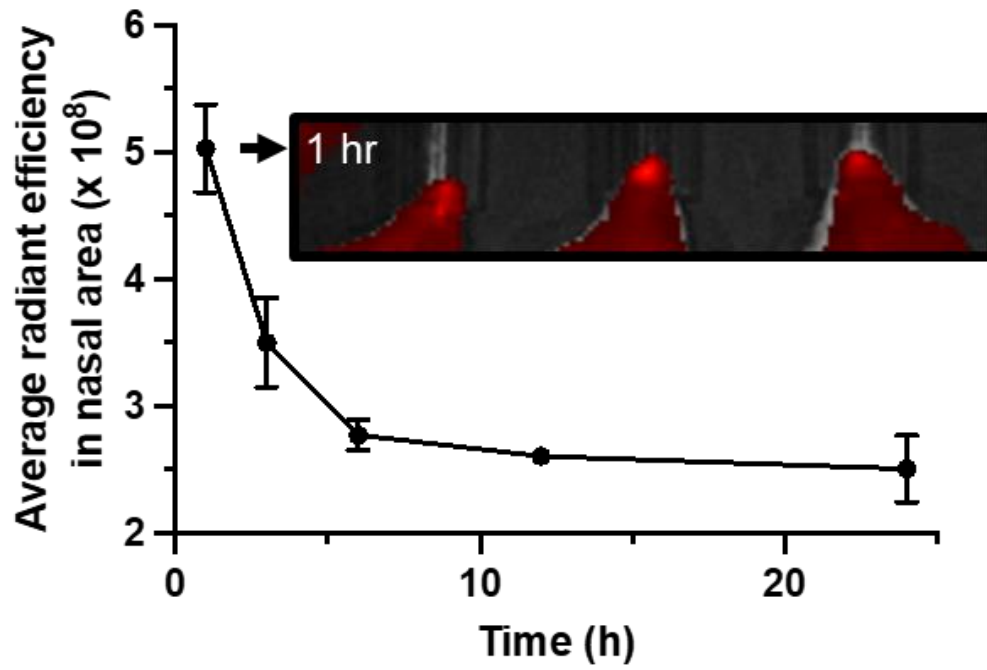

**Figure S4. Intranasal delivery of H84T-BanLec.** BALB/c mice were administered AF647-tagged H84T-BanLec intranasally. Mice were visualized by *in vivo* fluorescence imaging over 24 hours, and the fluorescence signal in the nasal area was quantified. Related to Figures 2 and 3.

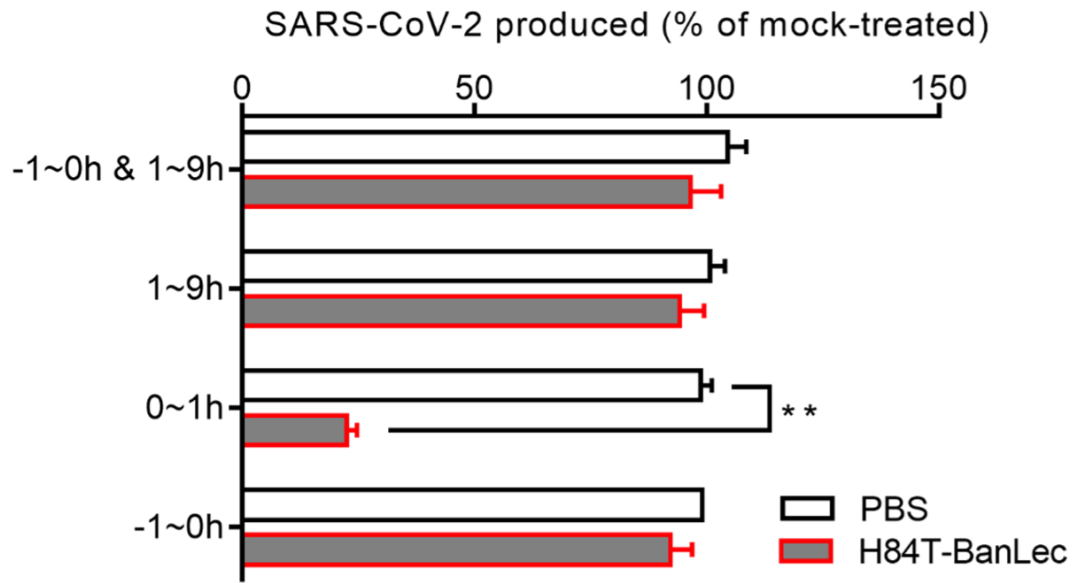

**Figure S5. H84T-BanLec targets SARS-CoV-2 entry.** Time-of-drug-addition assay indicated that H84T-BanLec interfered with SARS-CoV-2 entry. Student's t-test.  $**P < 0.01$ . Related to Figures 1 to 3.

(A)

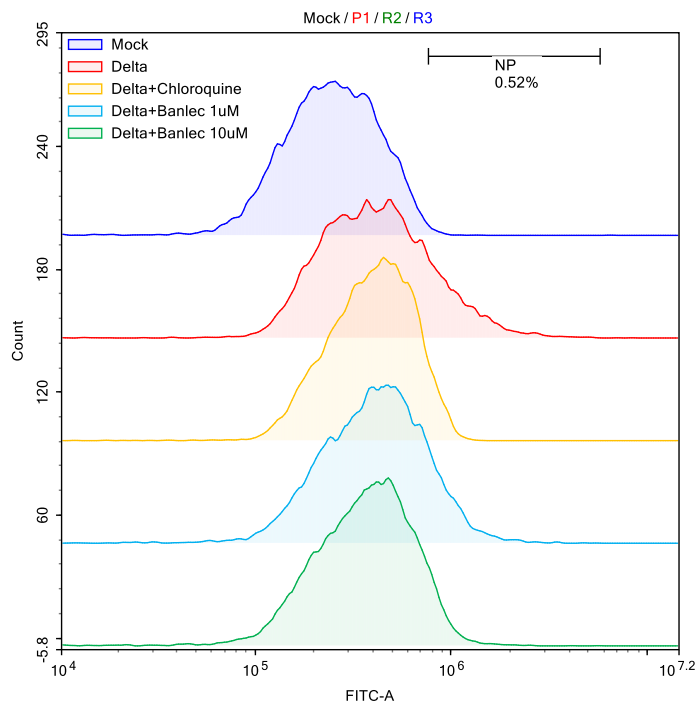

(B)

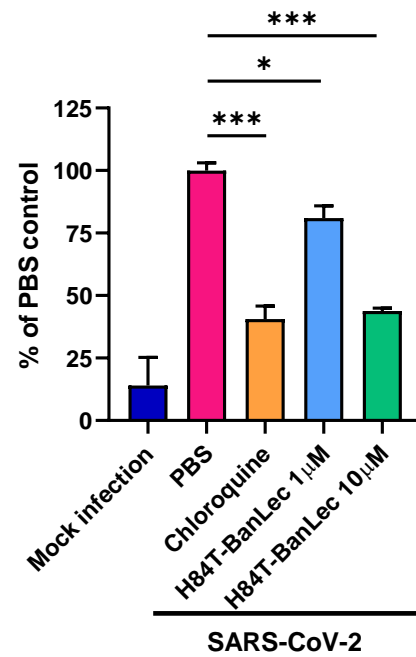

**Figure S6. Detection of SARS-CoV-2 entry by flow cytometry.** **A**, Representative histograms of mock- or SARS-CoV-2-infected cells (MOI = 1.0) permeabilized and then quantified by fluorescein isothiocyanate (FITC) staining after anti-SARS-CoV-2 nucleocapsid protein antibody and then anti-Alexa Flour 488 conjugated secondary antibody were added. The median fluorescence intensity (MFI) of each group is shown. **B**, SARS-CoV-2 nucleocapsid protein-positive cells were quantified after H84T-BanLec or PBS treatment. The results were shown as mean  $\pm$  SD of the PBS control and in triplicate. One-way ANOVA. \*\*\* $P$ <0.001, \* $P$ <0.05. Related to Figures 1 to 3.

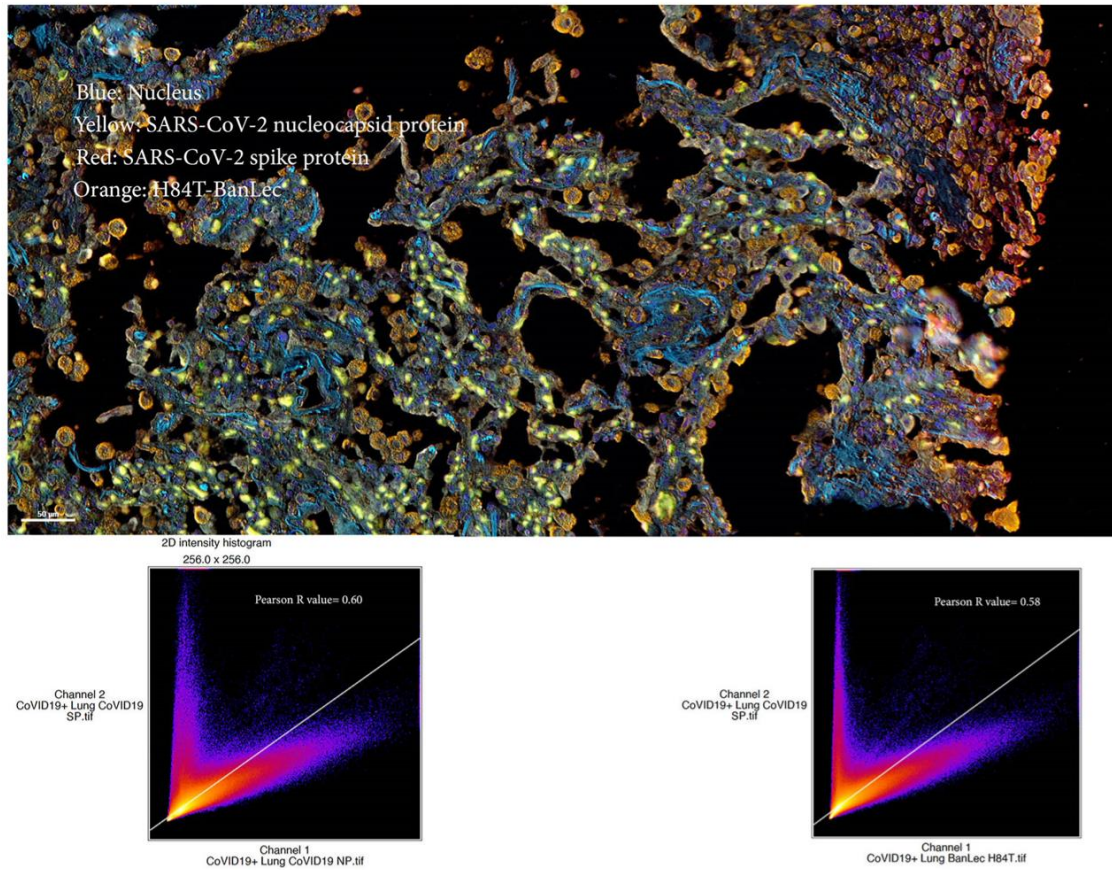

**Figure S7. Co-localization of H84T-BanLec with SARS-CoV-2 spike protein in the autopsied lung section of a deceased COVID-19 patient.** **Top**, Multiplex immunohistochemical analysis of SARS-CoV-2-infected autopsy lung section (SARS-CoV-2 nucleocapsid protein, yellow; SARS-CoV-2 spike protein, red; and H84T-BanLec, orange). Total original magnification 200 $\times$ . Sections were counterstained with DAPI to visualize nuclei (blue) and scanned using the Polaris Vectra multiplex spectral scanner. **Bottom**, The digital metadata were uploaded to FIJI for co-localization. The mean pixel intensity for each fluorochrome (0-256) at a particular centroid was plotted and the number of co-localizations calculated. The Pearson correlation calculation ranged from -1 to +1 and indicated inverse correlation (-1) through no correlation (0) to positive correlation (+1). The values calculated (0.6 and 0.58) for spike protein vs nucleocapsid protein and spike protein versus H84T-BanLec respectively represented high degrees of co-localization. Related to Figures 1 to 3.



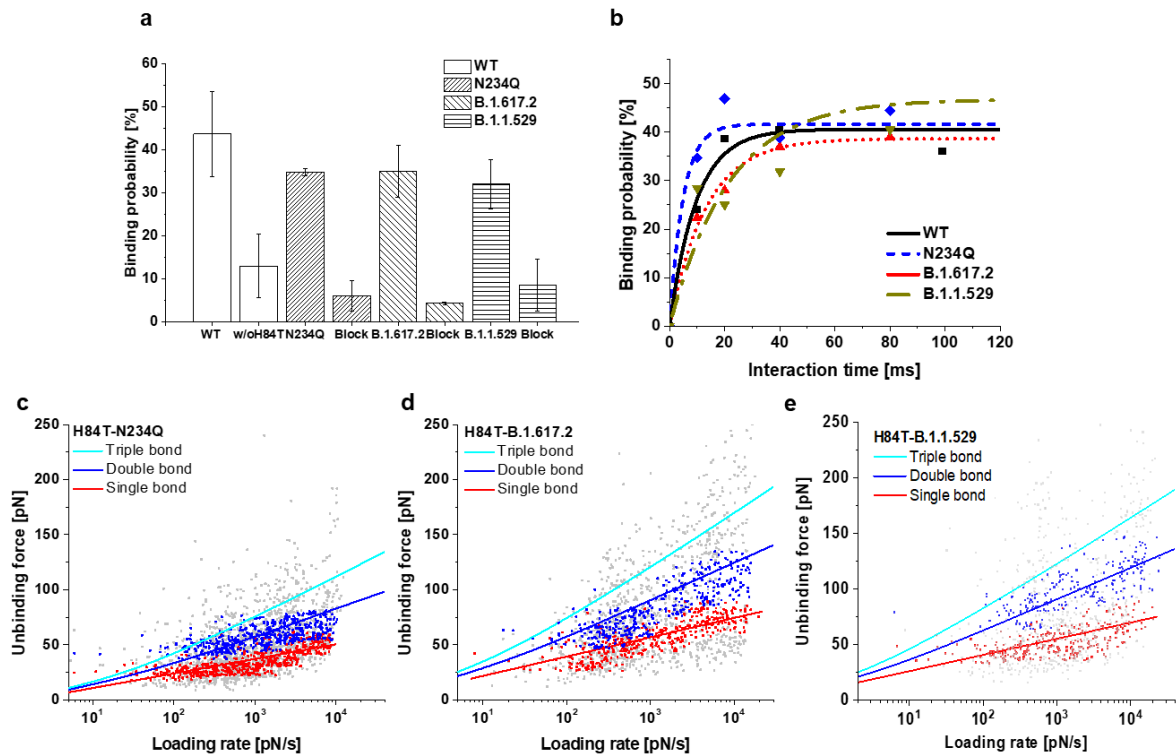

**Figure S8. Single molecule force spectroscopy measurements.** H84T-BanLec was immobilized onto surfaces and trimeric spike proteins were coupled to AFM tips. **a**, Binding activity and control experiments demonstrating the specificity of the interaction. Binding probability, presented as the percentage of force experiments displaying unbinding events, between H84T-BanLec and the spike of wild-type (WT), N234Q, B.1.617.2, and B.1.1.529 SARS-CoV-2 strains, respectively. Adjacent to the right of each binding activity experiment, control experiments using a surface only functionalized with PEG linker (without H84T, WT spike) or blocking experiments using pre-incubated spike coupled tip in H84T-BanLec solution for 20 min and adding H84T-BanLec (Block) into the measurement solution with N234Q, B.1.617.2 or B.1.1.529); a significant drop in the binding probability was seen in each case. **b**, Determination of kinetic on-rate between H84T-BanLec and the spike of WT, N234Q, B.1.617.2, and B.1.1.529 SARS-CoV-2 strains, respectively. Binding probability was plotted as a function of the interaction time. The solid line was the result of a least-square fit of a mono-exponential decay, assuming pseudo first-order kinetics. Plot of unbinding force versus loading rate for **c**, N234Q spike mutant **d**, B.1.617.2 spike trimer and **e**, B.1.1.529 spike trimer dissociating from H84T-BanLec. A Markov binding model computed the behavior of the double bond (blue) and triple bond (cyan) interactions, using parameters derived from the Bell and Evan's single-barrier model fit of the single bond (red). Related to Figures 4 and 5.

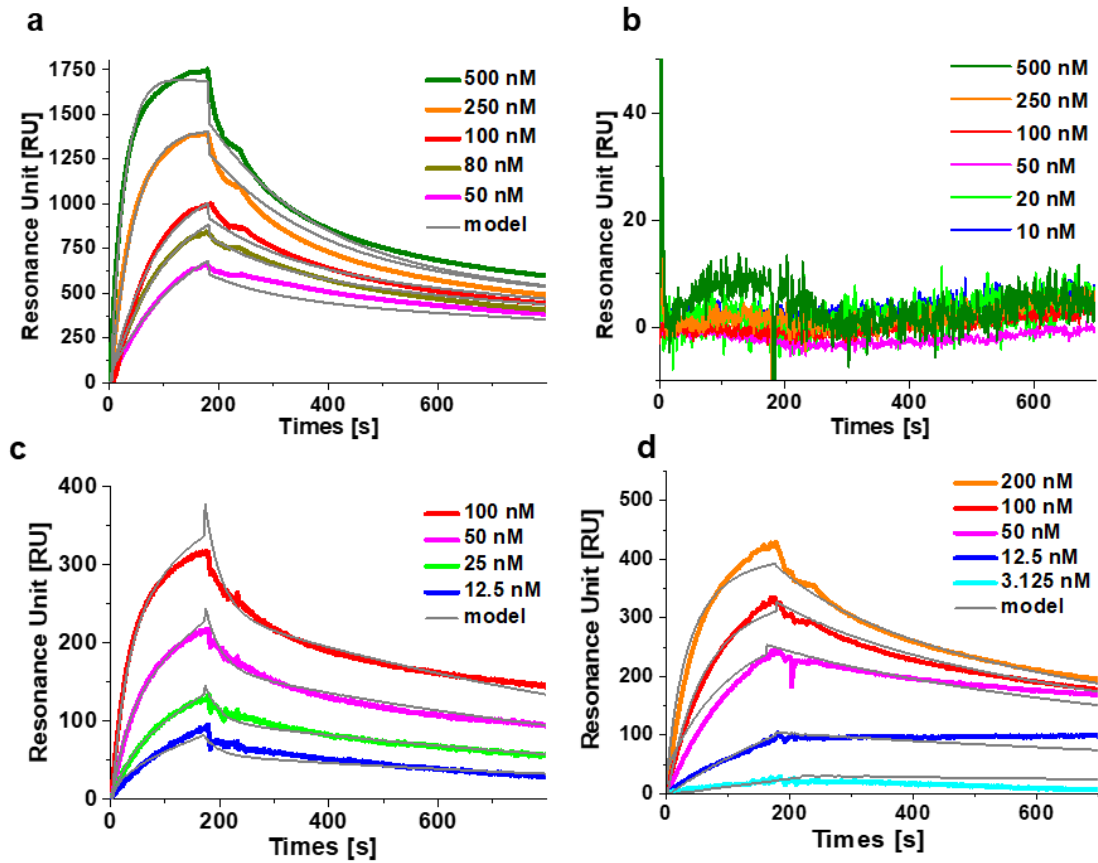

**Figure S9. Surface plasmon resonance (SPR) measurements.** H84T-BanLec was injected at the indicated concentrations to surfaces containing immobilized **a**, full-length trimeric N234Q spike mutant or **b**, receptor-binding domain to allow for binding (ascending parts), followed by wash out using buffer (descending parts) **c**, trimeric B.1.627.2 variant spike, and **d**, trimeric B.1.1.529 variant spike. Data were fitted using the bivalent binding model, consistent with H84T-BanLec being predominantly a dimer. To compare the binding of H84T-BanLec to the N234Q and B.1.627.2 spike proteins to that of the standard spike, see **Fig. 4H**. Related to Figures 4 and 5.

| Dynamic Force Spectroscopy (DFS) |                                                     |                                                      |                                                      |                                                      | Surface Plasmon Resonance (SPR)                      |                                                      |                                                      |                                                      |
|----------------------------------|-----------------------------------------------------|------------------------------------------------------|------------------------------------------------------|------------------------------------------------------|------------------------------------------------------|------------------------------------------------------|------------------------------------------------------|------------------------------------------------------|
|                                  | H84T-<br>BanLec<br>/Spike trimer                    | H84T-<br>BanLec<br>/N234Q<br>spike mutant            | H84T-<br>BanLec<br>/B.1.617.2<br>trimer              | H84T-<br>BanLec<br>/B.1.1.529<br>trimer              | H84T-<br>BanLec<br>/Spike trimer                     | H84T-<br>BanLec<br>/N234Q<br>spike mutant            | H84T-<br>BanLec<br>/B.1.617.2<br>trimer              | H84T-<br>BanLec<br>/B.1.1.529<br>trimer              |
| <b>k<sub>off,1</sub> [1/s]</b>   | 0.0457 ±<br>0.024                                   | 0.2585 ±<br>0.0135                                   | 0.0476 ±<br>0.0246                                   | 0.0314 ±<br>0.008                                    | 0.0262 ±<br>0.007                                    | 0.006 ±<br>0.0027                                    | 0.0249 ±<br>0.0031                                   | 0.0079 ±<br>0.0068                                   |
| <b>k<sub>on,1</sub> [1/MS]</b>   | 9.98 × 10 <sup>4</sup><br>± 5.18 × 10 <sup>4</sup>  | 2.87 × 10 <sup>5</sup><br>± 0.66 × 10 <sup>5</sup>   | 1.91 × 10 <sup>5</sup><br>± 0.52 × 10 <sup>5</sup>   | 3.46 × 10 <sup>4</sup><br>± 0.23 × 10 <sup>4</sup>   | 2.09 × 10 <sup>4</sup><br>± 0.25 × 10 <sup>4</sup>   | 2.99 × 10 <sup>4</sup><br>± 0.31 × 10 <sup>4</sup>   | 4.31 × 10 <sup>4</sup><br>± 0.23 × 10 <sup>4</sup>   | 3.80 × 10 <sup>4</sup><br>± 1.41 × 10 <sup>4</sup>   |
| <b>K<sub>D</sub> [M]</b>         | 4.6 × 10 <sup>-7</sup><br>± 4.37 × 10 <sup>-7</sup> | 9.61 × 10 <sup>-7</sup><br>± 2.68 × 10 <sup>-7</sup> | 2.54 × 10 <sup>-7</sup><br>± 1.06 × 10 <sup>-7</sup> | 9.17 × 10 <sup>-7</sup><br>± 3.16 × 10 <sup>-7</sup> | 1.28 × 10 <sup>-6</sup><br>± 0.19 × 10 <sup>-6</sup> | 2.17 × 10 <sup>-7</sup><br>± 1.14 × 10 <sup>-7</sup> | 5.76 × 10 <sup>-7</sup><br>± 0.41 × 10 <sup>-7</sup> | 3.63 × 10 <sup>-7</sup><br>± 4.23 × 10 <sup>-7</sup> |
| <b>X<sub>β</sub> [Å]</b>         | 7.83 ± 0.60                                         | 7.30 ± 0.15                                          | 6.53 ± 2.28                                          | 6.28 ± 0.32                                          |                                                      |                                                      |                                                      |                                                      |

**Table S1. Quantification of parameters obtained with dynamic force spectroscopy (DFS) and surface plasmon resonance (SPR) methods.** k<sub>on</sub>, k<sub>off</sub>, and K<sub>D</sub>, are kinetic on-rate, kinetic off-rate, and equilibrium dissociation constant, respectively, of a single bond (DFS) or the first binding step (SPR). X<sub>β</sub> denotes the distance of the activation barrier from the energy minimum along the pulling axis in DFS experiments. Related to Figures 4 and 5.
